# Supplementary material for: Topographic somatosensory imagery for real-time fMRI Brain-Computer Interfacing
Source: bioRxiv or medRxiv preprint supplement (doi:10.1101/296640), 2019-08-21
Supplement: Supplementary file [file 296640-1.pdf]

Supplementary table 1: Data from exit questionnaire on imagery strategies

|                                 | Quality of imagery (0-10) |      | Tactile sensation (0-10) |      | % of time imagery worked |      | Description of imagery                                                                                                                   |                                                                                                                                          |
|---------------------------------|---------------------------|------|--------------------------|------|--------------------------|------|------------------------------------------------------------------------------------------------------------------------------------------|------------------------------------------------------------------------------------------------------------------------------------------|
| Subject                         | hand                      | foot | hand                     | foot | hand                     | foot | hand                                                                                                                                     | foot                                                                                                                                     |
| S01                             | 7                         | 6    | 3                        | 2    | 79                       | 64   | Warm touch remembered from real touch                                                                                                    | Same as hand but translated to foot                                                                                                      |
| S05                             | 7                         | 7    | 8                        | 8    | *                        | *    | I tried to imagine touch                                                                                                                 | I tried to imagine touch                                                                                                                 |
| S07                             | 7                         | 6    | 2                        | 3    | *                        | *    | I mostly directed attention to the respective spot and tried to imagine the sensation                                                    | I mostly directed attention to the respective spot and tried to imagine the sensation                                                    |
| S04                             | 6                         | 6    | 4                        | 5    | *                        | *    | I tried to imagine stimulation from the piezo stimulator during the imagination                                                          | I tried to imagine stimulation from the piezo stimulator during the imagination                                                          |
| S03                             | 8                         | 7    | 8                        | 6    | 70                       | 80   | Hot feeling across the hand                                                                                                              | Hot feeling across the foot                                                                                                              |
| S06                             | 7                         | 7    | 5                        | 5    | *                        | *    | My strategy was to imagine pinpricks similar to the piezo stimulation on my hand and foot (although this was more difficult on the foot) | My strategy was to imagine pinpricks similar to the piezo stimulation on my hand and foot (although this was more difficult on the foot) |
| S02                             | 7                         | 7    | 7                        | 7    | 75                       | 75   | Imagine like warm water flowing all around my hand                                                                                       | Imagine like warm water flowing all around foot                                                                                          |
| S09                             | 6                         | 7    | 4                        | 3    | 69                       | 58   | Paint-brush on top of hand stroking each finger one at a time, starting from lateral side moving medially                                | Paint-brush stroke on soleof foot-starting from lateral side moving up and down towards medial side                                      |
| S08                             | 8                         | 6    | 8                        | 6    | 94                       | 84   | heat (mainly in the palm of my hand)                                                                                                     | heat (mainly in the middle part of the sole of foot)                                                                                     |
| S10                             | 6                         | 7    | 4                        | 4    | 98                       | 98   | I imagined being massaged with strong circular thumb finger movement on the inner side of my palm.                                       | I imagined being massaged with strong circular thumb finger movement on the inner (soft) side of my foot.                                |
| * data missing due to a mistake |                           |      |                          |      |                          |      |                                                                                                                                          |                                                                                                                                          |

Supplementary table 2: Number of functional voxels for each anatomical region and probability level.

| Supplementary Table 2                                                               |       |      |
|-------------------------------------------------------------------------------------|-------|------|
| <i>Number of functional voxels for each anatomical region and probability level</i> |       |      |
| Area                                                                                |       |      |
| Probability Level (%)                                                               | S1    | S2   |
| 100                                                                                 | 451   | 5    |
| 90                                                                                  | 1031  | 169  |
| 80                                                                                  | 1701  | 500  |
| 70                                                                                  | 2556  | 917  |
| 60                                                                                  | 3721  | 1444 |
| 50                                                                                  | 4986  | 2124 |
| 40                                                                                  | 6373  | 2816 |
| 30                                                                                  | 8232  | 3673 |
| 20                                                                                  | 10638 | 5011 |
| 10                                                                                  | 14543 | 7254 |

Supplementary table 3: Average decoding accuracy for each anatomical region and probability level based on cross validation with N-1 training runs and 1 test run.

| Supplementary Table 3                                                                                                                      |      |      |  |
|--------------------------------------------------------------------------------------------------------------------------------------------|------|------|--|
| Average decoding accuracy for each anatomical region and probability level based on crossvalidation with N-1 training runs and 1 test run. |      |      |  |
| Areas                                                                                                                                      |      |      |  |
| Probability Level (%)                                                                                                                      | S1   | S2   |  |
| 100                                                                                                                                        | 0.67 | 0.51 |  |
| 90                                                                                                                                         | 0.73 | 0.60 |  |
| 80                                                                                                                                         | 0.74 | 0.64 |  |
| 70                                                                                                                                         | 0.76 | 0.66 |  |
| 60                                                                                                                                         | 0.78 | 0.69 |  |
| 50                                                                                                                                         | 0.80 | 0.70 |  |
| 40                                                                                                                                         | 0.81 | 0.71 |  |
| 30                                                                                                                                         | 0.81 | 0.73 |  |
| 20                                                                                                                                         | 0.82 | 0.73 |  |
| 10                                                                                                                                         | 0.82 | 0.73 |  |
